# Supplementary material for: Application of the Nutrient-Rich Food Index 9.3 and the Dietary Inflammatory Index for Assessing Maternal Dietary Quality in Japan: A Single-Center Birth Cohort Study
Source: MDPI journal article supplement (doi:10.3390/nu13082854), 2021-08-19
Supplement: s1 [file s1]

Figure S1. Sensitivity analysis for breakdown of Nutrient-Rich Food Index 9.3 (NRF9.3) into component scores by excluding the participants with misreported energy intake.

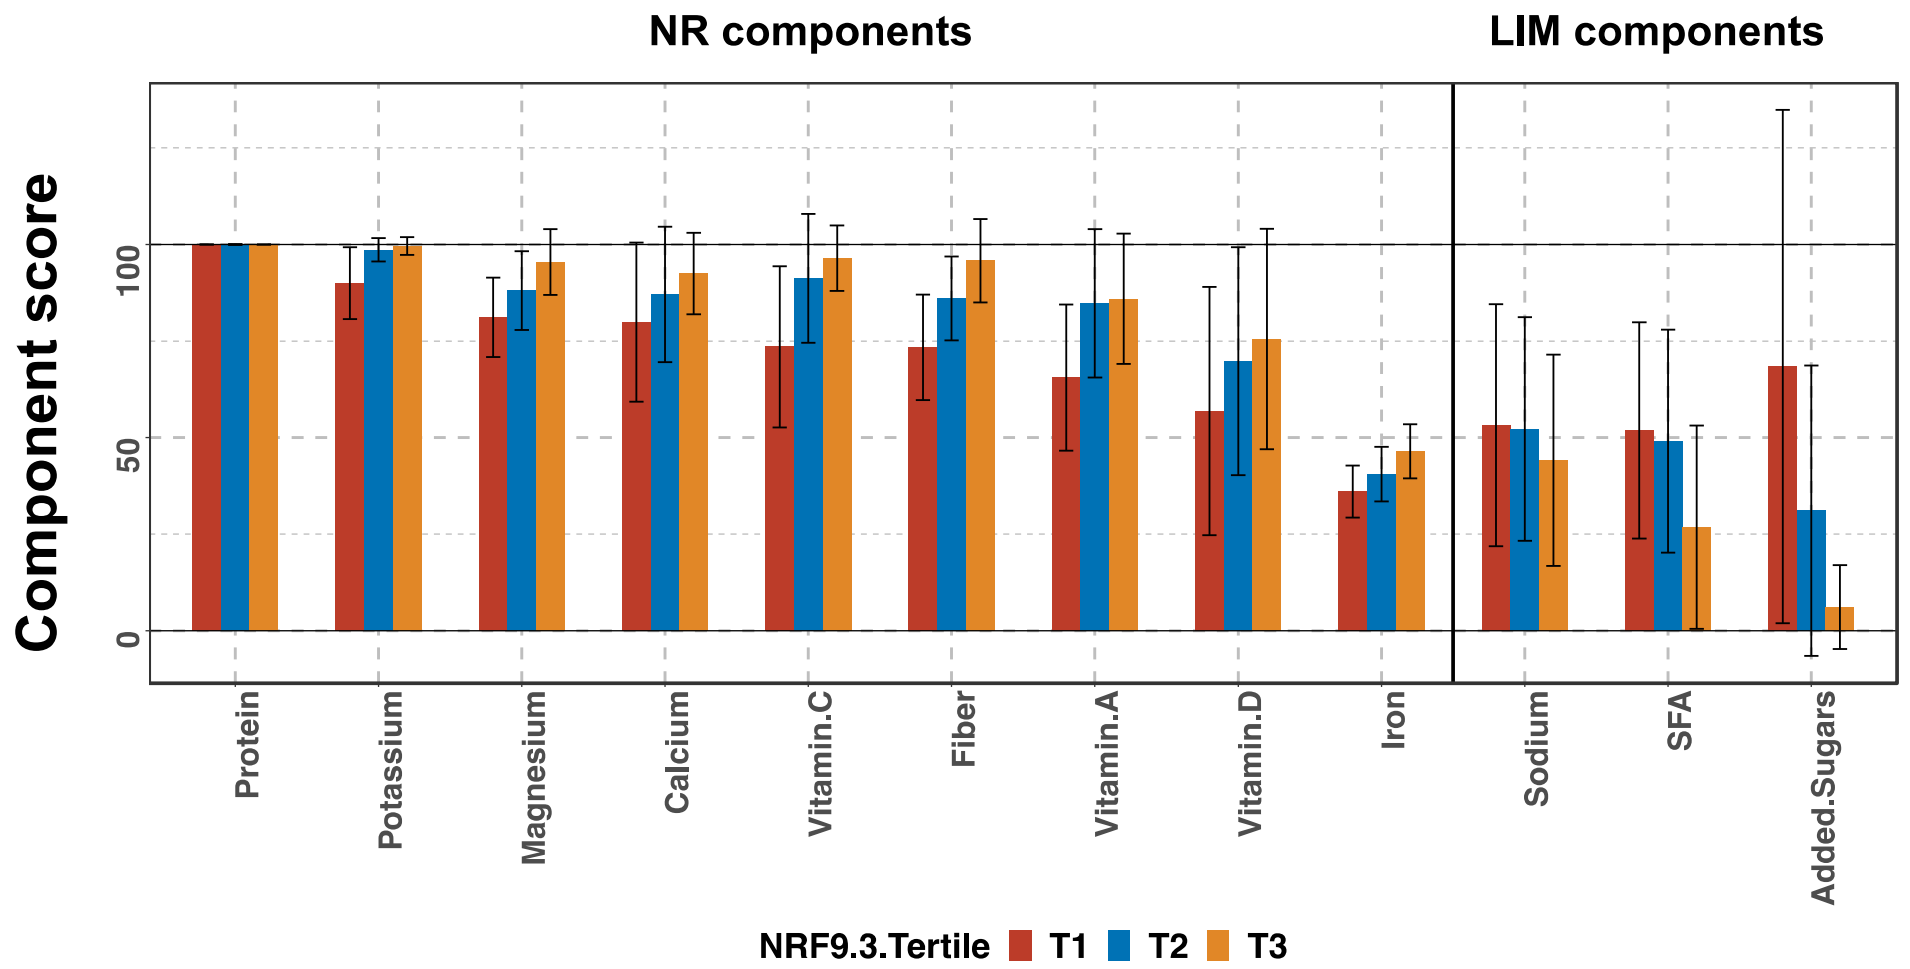

Bars show the mean and error bars represent standard deviation (SD). The nutrients constituting the NR and LIM sub-scores are shown from left to right, from the highest to lowest mean score of the entire cohort. For the NR sub-scores, a higher score indicates a higher dietary quality, while for the LIM sub-scores, a higher score indicates a lower dietary quality. SFA, saturated fatty acids. *n* = 30 (T1), 30 (T2), and 31 (T3).

Figure S2. Sensitivity analysis for breakdown of energy-adjusted dietary inflammatory index (E-DII) into parameter-specific scores by excluding the participants with misreported energy intake.

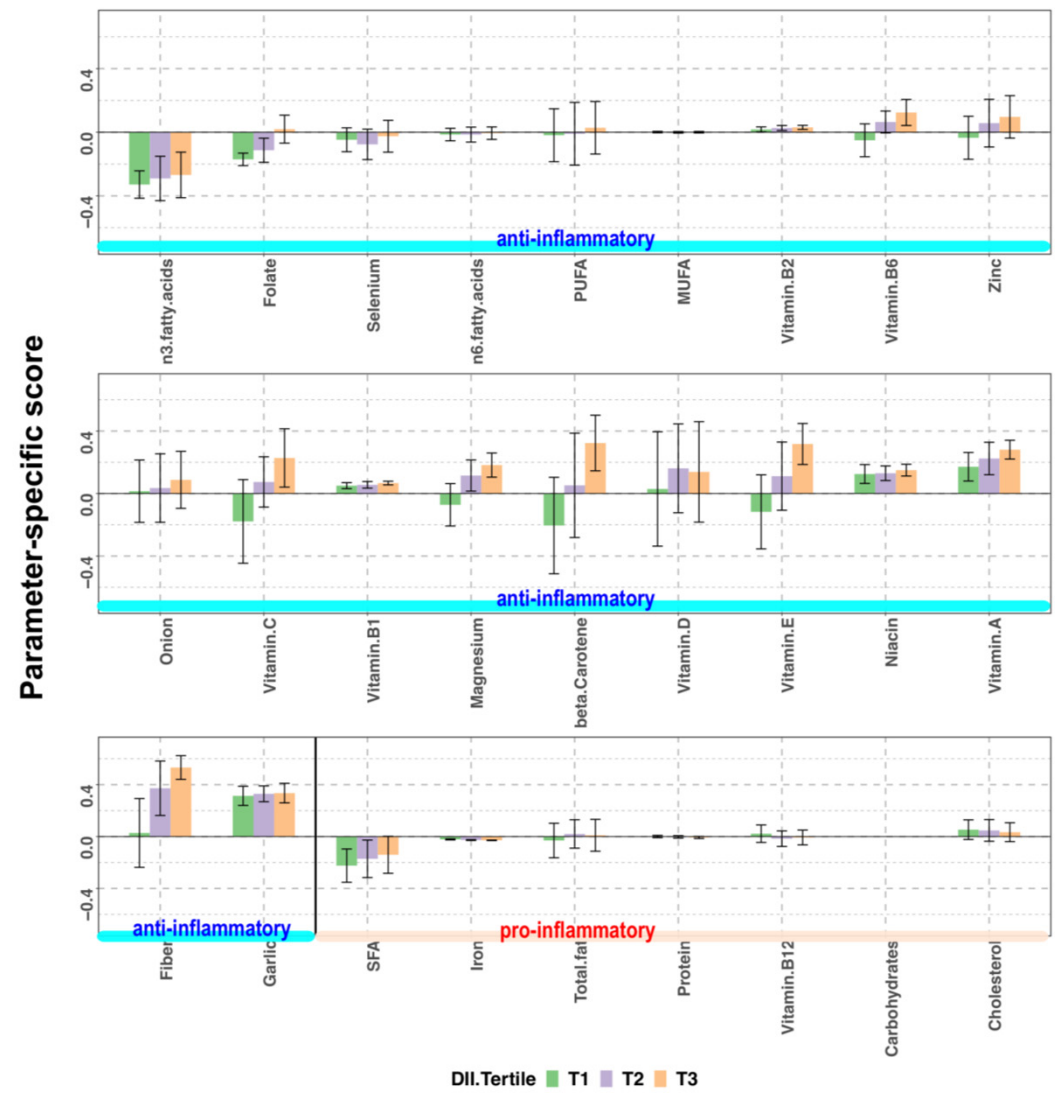

Bars represent the mean and error bars represent standard deviation (SD). The anti-inflammatory and pro-inflammatory parameters constituting the E-DII score are shown from left to right, from the lowest to the highest mean score of the entire cohort. Since the effect score of anti-inflammatory parameters are negative, lower intake of anti-inflammatory nutrients compared to the global mean result in a positive parameter-specific score. In contrast, as the effect score of pro-inflammatory parameters are positive, higher intake of pro-inflammatory nutrients result in a positive parameter-specific score. Higher E-DII scores indicate higher inflammatory potential. SFA, saturated fatty acids; MUFA, monounsaturated fatty acids; PUFA, polyunsaturated fatty acid;  $n = 30$  (T1),  $30$  (T2), and  $31$  (T3).

Table S1. Age-specific reference daily values (RDV) for women at mid-gestation for Nutrient-Rich Food Index 9.3 (NRF9.3).

| Age category                                |                                           | 18-29 years | 30-49 years |
|---------------------------------------------|-------------------------------------------|-------------|-------------|
| Estimated requirement                       | Energy (kcal/day) <sup>a</sup>            | 2200        | 2250        |
| Qualifying nutrients<br>(NR components)     | Protein (g) <sup>b</sup>                  | 60          | 60          |
|                                             | Dietary fiber (g) <sup>c</sup>            | 18          | 18          |
|                                             | Vitamin A (ugRAE) <sup>b</sup>            | 650         | 700         |
|                                             | Vitamin C (mg) <sup>b</sup>               | 110         | 110         |
|                                             | Vitamin D (ug) <sup>d</sup>               | 7           | 7           |
|                                             | Calcium (mg) <sup>b</sup>                 | 650         | 650         |
|                                             | Iron (mg) <sup>b</sup>                    | 21          | 21.5        |
|                                             | Postassium (mg) <sup>c</sup>              | 2600        | 2600        |
|                                             | Magnesium (mg) <sup>b</sup>               | 310         | 330         |
| Disqualifying nutrients<br>(LIM components) | Saturated fatty acids (g) <sup>c,e</sup>  | 17.1        | 17.5        |
|                                             | Added sugars (g) <sup>f</sup>             | 27.5        | 28.1        |
|                                             | Sodium (g NaCl equivalent) <sup>c,g</sup> | 7           | 7           |

RAE, retinol activity equivalent. <sup>a</sup>Estimated Energy Requirement for moderate level of physical activity for women at mid-gestation. <sup>b</sup>Recommended Dietary Allowance (RDA). <sup>c</sup>Tentative dietary goal for preventing lifestyle-related diseases (DG). <sup>d</sup>Adequate Intake (AI). <sup>e</sup>Determined based on the DG value (7% of energy). <sup>f</sup>Determined based on the World Health Organization’s conditional recommendation (5% of energy). <sup>g</sup>7 g NaCl equivalent = 2756 mg sodium.

Table S2. Food parameters of energy-adjusted dietary inflammatory index (E-DII) used in this study.

| Parameter used <sup>a</sup> | Global daily mean intake units <sup>a</sup> per 1000 kcal energy intake | Global daily mean intake SD <sup>a</sup> per 1000kcal energy intake | Overall inflammatory effect score <sup>a</sup> | BC-GENIST                               |                                |                               |
|-----------------------------|-------------------------------------------------------------------------|---------------------------------------------------------------------|------------------------------------------------|-----------------------------------------|--------------------------------|-------------------------------|
|                             |                                                                         |                                                                     |                                                | Mean intake per 1000 kcal energy intake | SD per 1000 kcal energy intake | Mean E-DII value of parameter |
| Vitamin B12 (ug)            | 2.50                                                                    | 1.31                                                                | 0.106                                          | 2.74                                    | 1.73                           | -0.001                        |
| Vitamin B6 (mg)             | 0.71                                                                    | 0.36                                                                | -0.365                                         | 0.66                                    | 0.17                           | 0.042                         |
| β-Carotene (ug)             | 1808                                                                    | 837                                                                 | -0.584                                         | 1690                                    | 927                            | 0.077                         |
| Carbohydrates (g)           | 132                                                                     | 19                                                                  | 0.097                                          | 132                                     | 15                             | -0.001                        |
| Cholesterol (mg)            | 136                                                                     | 25                                                                  | 0.11                                           | 177                                     | 60                             | 0.048                         |
| Total fat (g)               | 34.73                                                                   | 9.44                                                                | 0.298                                          | 34.53                                   | 5.81                           | -0.005                        |
| Dietary fiber (g)           | 9.14                                                                    | 2.38                                                                | -0.663                                         | 7.33                                    | 1.94                           | 0.306                         |
| Folate (ug)                 | 133                                                                     | 34                                                                  | -0.19                                          | 175                                     | 58                             | -0.082                        |
| Garlic (g)                  | 2.12                                                                    | 1.41                                                                | -0.412                                         | 0.23                                    | 0.44                           | 0.329                         |
| Iron (mg)                   | 6.49                                                                    | 1.80                                                                | 0.032                                          | 3.92                                    | 0.84                           | -0.026                        |
| Magnesium (mg)              | 150.8                                                                   | 67.8                                                                | -0.484                                         | 138.2                                   | 31.1                           | 0.069                         |
| MUFAs (g)                   | 13.13                                                                   | 2.97                                                                | -0.009                                         | 12.80                                   | 2.73                           | 0.001                         |
| Niacin (mg)                 | 12.60                                                                   | 5.72                                                                | -0.246                                         | 8.18                                    | 2.11                           | 0.131                         |
| n-3 Fatty acids (g)         | 0.52                                                                    | 0.52                                                                | -0.436                                         | 1.18                                    | 0.49                           | -0.297                        |
| n-6 Fatty acids (g)         | 5.25                                                                    | 3.65                                                                | -0.159                                         | 5.67                                    | 1.32                           | -0.013                        |
| Onion (g)                   | 17.46                                                                   | 8.95                                                                | -0.301                                         | 16.63                                   | 16.09                          | 0.050                         |
| Protein (g)                 | 38.62                                                                   | 6.76                                                                | 0.021                                          | 37.44                                   | 5.00                           | -0.003                        |
| PUFAs (g)                   | 6.75                                                                    | 1.83                                                                | -0.337                                         | 6.87                                    | 1.55                           | -0.007                        |
| Vitamin B2 (mg)             | 0.83                                                                    | 0.38                                                                | -0.068                                         | 0.64                                    | 0.14                           | 0.024                         |
| Saturated fatty acids (g)   | 13.91                                                                   | 3.89                                                                | 0.373                                          | 10.81                                   | 2.54                           | -0.185                        |
| Selenium (ug)               | 32.59                                                                   | 12.21                                                               | -0.191                                         | 38.37                                   | 10.87                          | -0.051                        |
| Vitamin B1 (mg)             | 0.83                                                                    | 0.32                                                                | -0.098                                         | 0.55                                    | 0.13                           | 0.056                         |
| Vitamin A (ugRAE)           | 478.6                                                                   | 252.2                                                               | -0.401                                         | 261.2                                   | 99.5                           | 0.232                         |
| Vitamin C (mg)              | 57.49                                                                   | 21.14                                                               | -0.424                                         | 56.33                                   | 29.01                          | 0.054                         |
| Vitamin D (ug)              | 3.04                                                                    | 1.07                                                                | -0.446                                         | 2.94                                    | 2.44                           | 0.094                         |
| Vitamin E (mg)              | 4.25                                                                    | 0.72                                                                | -0.419                                         | 3.93                                    | 1.13                           | 0.114                         |
| Zinc (mg)                   | 4.79                                                                    | 1.07                                                                | -0.313                                         | 4.58                                    | 0.77                           | 0.045                         |

MUFAs, mono-unsaturated fatty acids; PUFAs, poly-unsaturated fatty acids; RAE, retinol activity equivalent; SD, standard deviation. <sup>a</sup>Shivappa N, Steck SE, Hurley TG, Hussey JR, Hébert JR. Designing and developing a literature-derived, population-based dietary inflammatory index. Public Health Nutr. 2014;17(8):1689-96.

Table S3. Overall nutritional characteristics of participants in this study and comparison with the results from the National Health and Nutrition Survey (NHNS) of pregnant women, in Japan.

|                            | Current study (BC-GENIST) |      |        | National Health and Nutrition Survey (NHNS), Pregnant women , Japan in 2015 |      |        | National Health and Nutrition Survey (NHNS), Pregnant women, Japan in 2016 |      |        | National Health and Nutrition Survey (NHNS), Pregnant women, Japan in 2017 |      |        |
|----------------------------|---------------------------|------|--------|-----------------------------------------------------------------------------|------|--------|----------------------------------------------------------------------------|------|--------|----------------------------------------------------------------------------|------|--------|
|                            | mean                      | SD   | median | mean                                                                        | SD   | median | mean                                                                       | SD   | median | mean                                                                       | SD   | median |
|                            | n = 108                   |      |        | n = 23                                                                      |      |        | n = 83                                                                     |      |        | n = 31                                                                     |      |        |
| Energy (kcal)              | 1680                      | 277  | 1673   | 1713                                                                        | 574  | 1822   | 1704                                                                       | 442  | 1712   | 1653                                                                       | 311  | 1644   |
| Protein (g)                | 62.7                      | 12.4 | 61.6   | 65.9                                                                        | 25.2 | 60.6   | 58.1                                                                       | 13.3 | 57.9   | 60.9                                                                       | 17.2 | 56.7   |
| Saturated fatty acids (g)  | 18.24                     | 5.46 | 18.46  | 14.36                                                                       | 8.77 | 12.46  | 15.79                                                                      | 7.10 | 15.79  | 14.20                                                                      | 5.74 | 13.30  |
| n-6 Fatty acids (g)        | 9.48                      | 2.51 | 8.99   | 9.51                                                                        | 5.02 | 9.32   | 9.09                                                                       | 3.35 | 9.13   | 10.32                                                                      | 4.16 | 10.18  |
| n-3 Fatty acids (g)        | 1.97                      | 0.84 | 1.83   | 1.93                                                                        | 1.20 | 1.64   | 1.72                                                                       | 0.98 | 1.48   | 2.11                                                                       | 1.02 | 1.86   |
| PFC-F (%)                  | 31.1                      | 5.2  | 31.1   | 26.8                                                                        | 7.7  | 26.1   | 29.5                                                                       | 6.8  | 31.2   | 29.5                                                                       | 5.3  | 29.3   |
| PFC-C (%)                  | 52.7                      | 6.2  | 52.7   | 57.9                                                                        | 8.6  | 60.0   | 56.5                                                                       | 7.2  | 54.8   | 55.7                                                                       | 6.8  | 55.3   |
| Dietary fiber (g)          | 12.3                      | 3.7  | 11.5   | 14.2                                                                        | 5.9  | 12.0   | 14.0                                                                       | 6.5  | 13.0   | 13.3                                                                       | 4.6  | 11.9   |
| Vitamin A (ugRAE)          | 442                       | 195  | 381    | 521                                                                         | 358  | 431    | 506                                                                        | 594  | 351    | 445                                                                        | 219  | 397    |
| Vitamin D (ug)             | 4.9                       | 4.2  | 4.1    | 6.3                                                                         | 7.9  | 3.4    | 4.0                                                                        | 5.9  | 1.9    | 5.6                                                                        | 7.8  | 2.8    |
| Vitamin E (mg)             | 6.6                       | 2.2  | 6.3    | 6.7                                                                         | 3.1  | 6.3    | 6.4                                                                        | 3.0  | 6.2    | 6.2                                                                        | 2.4  | 5.7    |
| Vitamin K (ug)             | 232                       | 132  | 195    | 205                                                                         | 120  | 184    | 233                                                                        | 149  | 159    | 297                                                                        | 232  | 231    |
| Vitamin B1 (mg)            | 0.93                      | 0.25 | 0.91   | 0.79                                                                        | 0.25 | 0.86   | 0.80                                                                       | 0.29 | 0.77   | 0.77                                                                       | 0.27 | 0.76   |
| Vitamin B2 (mg)            | 1.07                      | 0.28 | 1.01   | 0.99                                                                        | 0.42 | 0.97   | 1.01                                                                       | 0.34 | 1.01   | 1.03                                                                       | 0.49 | 0.87   |
| Niacin (mgNE)              | 13.7                      | 3.9  | 13.5   | 12.2                                                                        | 4.9  | 11.7   | 11.1                                                                       | 5.0  | 9.2    | 11.4                                                                       | 4.5  | 11.1   |
| Vitamin B6 (mg)            | 1.11                      | 0.34 | 1.09   | 1.11                                                                        | 0.38 | 1.19   | 0.98                                                                       | 0.47 | 0.87   | 0.92                                                                       | 0.30 | 0.86   |
| Vitamin B12 (ug)           | 4.6                       | 3.0  | 3.8    | 3.9                                                                         | 2.9  | 3.4    | 3.9                                                                        | 4.2  | 2.3    | 4.1                                                                        | 3.1  | 3.4    |
| Folate (ug)                | 293                       | 110  | 281    | 265                                                                         | 109  | 263    | 232                                                                        | 89   | 220    | 253                                                                        | 117  | 236    |
| Pantothenic acid (mg)      | 5.38                      | 1.31 | 5.32   | 5.19                                                                        | 1.79 | 5.63   | 5.07                                                                       | 1.68 | 4.80   | 4.92                                                                       | 1.77 | 4.62   |
| Vitamin C (mg)             | 94                        | 49   | 82     | 95                                                                          | 57   | 91     | 67                                                                         | 54   | 54     | 63                                                                         | 40   | 48     |
| Potassium (mg)             | 2231                      | 623  | 2134   | 2199                                                                        | 663  | 2207   | 1932                                                                       | 792  | 1782   | 1864                                                                       | 627  | 1896   |
| Calcium (mg)               | 470                       | 171  | 442    | 502                                                                         | 269  | 441    | 466                                                                        | 188  | 480    | 436                                                                        | 242  | 355    |
| Magnesium (mg)             | 232                       | 64   | 221    | 218                                                                         | 66   | 232    | 214                                                                        | 75   | 197    | 202                                                                        | 66   | 189    |
| Phosphorus (mg)            | 926                       | 208  | 879    | 932                                                                         | 338  | 871    | 862                                                                        | 230  | 865    | 863                                                                        | 285  | 772    |
| Iron (mg)                  | 6.6                       | 1.7  | 6.3    | 6.5                                                                         | 2.4  | 6.4    | 6.6                                                                        | 2.5  | 6.1    | 6.8                                                                        | 2.3  | 6.5    |
| Zinc (mg)                  | 7.7                       | 1.9  | 7.4    | 7.2                                                                         | 3.5  | 6.8    | 7.3                                                                        | 1.9  | 7.3    | 7.4                                                                        | 1.8  | 7.1    |
| Copper (mg)                | 0.99                      | 0.25 | 0.97   | 0.98                                                                        | 0.38 | 0.95   | 1.03                                                                       | 0.31 | 1.02   | 1.03                                                                       | 0.28 | 1.03   |
| Sodium (g NaCl equivalent) | 7.9                       | 1.8  | 7.7    | 9.5                                                                         | 3.1  | 9.0    | 8.8                                                                        | 3.3  | 8.7    | 8.6                                                                        | 2.6  | 9.0    |

RAE, retinol activity equivalent; NE, niacin equivalent; EER, Estimated Energy Requirement; Data of National Institute of Health and Nutrition J. Nutritional Intake Status Survey was obtained from <https://www.nibiohn.go.jp/eiken/kenkounippon21/en/eiyouchousa/>.

Table S4. Proportion of participants (%) whose intake was less than the Estimated Average Requirement (EAR) or the Adequate Intake (AI) across the tertile (T) categories of Nutrient-Rich Food Index 9.3 (NRF9.3) score.

| Nutrients                  |                                  | T1 (n = 36) | T2 (n = 36) | T3 (n = 36) |
|----------------------------|----------------------------------|-------------|-------------|-------------|
| Energy producing nutrients | Protein (g) <sup>a</sup>         | 11.1        | 11.1        | 0.0         |
|                            | n-3 Fatty acids (g) <sup>b</sup> | 58.3        | 50.0        | 30.6        |
|                            | n-6 Fatty acids (g) <sup>b</sup> | 50.0        | 63.9        | 36.1        |
| Vitamins                   | Vitamin A (ugRAE) <sup>a</sup>   | 86.1        | 61.1        | 47.2        |
|                            | Vitamin D (ug) <sup>b</sup>      | 83.3        | 80.6        | 61.1        |
|                            | Vitamin E (mg) <sup>b</sup>      | 80.6        | 58.3        | 33.3        |
|                            | Vitamin B1 (mg) <sup>a</sup>     | 86.1        | 75.0        | 66.7        |
|                            | Vitamin B2 (mg) <sup>a</sup>     | 86.1        | 61.1        | 58.3        |
|                            | Niacin (mgNE) <sup>a</sup>       | 16.7        | 19.4        | 5.6         |
|                            | Vitamin B6 (mg) <sup>a</sup>     | 86.1        | 72.2        | 33.3        |
|                            | Vitamin B12 (ug) <sup>a</sup>    | 27.8        | 22.2        | 13.9        |
|                            | Folate (ug) <sup>a</sup>         | 97.2        | 88.9        | 63.9        |
|                            | Vitamin C (mg) <sup>a</sup>      | 86.1        | 52.8        | 30.6        |
| Minerals                   | Potassium (mg) <sup>b</sup>      | 72.2        | 38.9        | 8.3         |
|                            | Calcium (mg) <sup>a</sup>        | 83.3        | 69.4        | 69.4        |
|                            | Magnesium (mg) <sup>a</sup>      | 97.2        | 88.9        | 44.4        |
|                            | Iron (mg) <sup>a</sup>           | 100.0       | 100.0       | 100.0       |
|                            | Zinc (mg) <sup>a</sup>           | 47.2        | 41.7        | 33.3        |
|                            | Selenium (ug) <sup>a</sup>       | 0.0         | 5.6         | 0.0         |

<sup>a</sup>Estimated Average Requirement (EAR). <sup>b</sup>Adequate Intake (AI).

Table S5. Proportion of participants (%) whose intake was less than the Estimated Average Requirement (EAR) or the Adequate Intake (AI) across the tertile (T) categories of energy-adjusted dietary inflammatory index (E-DII) score.

| Nutrients                  |                                  | T1 (n = 36) | T2 (n = 36) | T3 (n = 36) |
|----------------------------|----------------------------------|-------------|-------------|-------------|
| Energy producing nutrients | Protein (g) <sup>a</sup>         | 0.0         | 11.1        | 11.1        |
|                            | n-3 Fatty acids (g) <sup>b</sup> | 27.8        | 44.4        | 66.7        |
|                            | n-6 Fatty acids (g) <sup>b</sup> | 30.6        | 58.3        | 61.1        |
| Vitamins                   | Vitamin A (ugRAE) <sup>a</sup>   | 38.9        | 69.4        | 86.1        |
|                            | Vitamin D (ug) <sup>b</sup>      | 61.1        | 83.3        | 80.6        |
|                            | Vitamin E (mg) <sup>b</sup>      | 25.0        | 55.6        | 91.7        |
|                            | Vitamin B1 (mg) <sup>a</sup>     | 58.3        | 80.6        | 88.9        |
|                            | Vitamin B2 (mg) <sup>a</sup>     | 50.0        | 69.4        | 86.1        |
|                            | Niacin (mgNE) <sup>a</sup>       | 2.8         | 16.7        | 22.2        |
|                            | Vitamin B6 (mg) <sup>a</sup>     | 33.3        | 75.0        | 83.3        |
|                            | Vitamin B12 (ug) <sup>a</sup>    | 11.1        | 22.2        | 30.6        |
|                            | Folate (ug) <sup>a</sup>         | 55.6        | 94.4        | 100.0       |
|                            | Vitamin C (mg) <sup>a</sup>      | 30.6        | 52.8        | 86.1        |
| Minerals                   | Potassium (mg) <sup>b</sup>      | 5.6         | 38.9        | 75.0        |
|                            | Calcium (mg) <sup>a</sup>        | 61.1        | 77.8        | 83.3        |
|                            | Magnesium (mg) <sup>a</sup>      | 38.9        | 91.7        | 100.0       |
|                            | Iron (mg) <sup>a</sup>           | 100.0       | 100.0       | 100.0       |
|                            | Zinc (mg) <sup>a</sup>           | 33.3        | 33.3        | 55.6        |
|                            | Selenium (ug) <sup>a</sup>       | 0.0         | 5.6         | 0.0         |

<sup>a</sup>Estimated Average Requirement (EAR). <sup>b</sup>Adequate Intake (AI).
